# Supplementary material for: Quantitative proteomic analysis of aqueous humor from patients with drusen and reticular pseudodrusen in age-related macular degeneration
Source: BMC Ophthalmol. 2018 Nov 7;18:289. doi: 10.1186/s12886-018-0941-9 (PMC6222993; doi:10.1186/s12886-018-0941-9)
Supplement: Supplementary file 2 — Table S3. Quantitative results of 119 aqueous humor proteins from control, drusen, and reticular pseudodrusen (RPD) samples. The area of all 119 aqueous humor proteins and the ratios of each protein area between control versus drusen and control versus RPD were included. (XLSX 31 kb) [file 12886_2018_941_MOESM2_ESM.xlsx]

## Sheet: Suppl.Table
Protein Preferred Name	Protein Gene	Protein Description	log2Ratio	log2Ratio	Control		Drusen		RPD		ANOVA			Sum	Rank	Average			Coefficient of Variant
			Drusen/Control	RPD/Control	01	02	01	02	01	02	Significant	(-log p-value)	(q-value)	Area	N	Control	Drusen	RPD	Control	Drusen	RPD
ASAH1_HUMAN	ASAH1	Acid ceramidase	0.03	0.83	419	597	540	496	843	962	+	1.46461	0.0262979	3857	105	508	518	903	0.25	0.06	0.09
AFAM_HUMAN	AFM	Afamin	-0.53	-0.2	4698	4109	3218	2872	3403	4254		0.922958	0.0688358	22554	38	4404	3045	3829	0.09	0.08	0.16
AL3A1_HUMAN	ALDH3A1	Aldehyde dehydrogenase, dimeric NADP-preferring	-0.37	1.77	3000	1521	2024	1475	7387	8082	+	2.22926	0	23489	37	2260	1750	7734	0.46	0.22	0.06
A1AG1_HUMAN	ORM1	Alpha-1-acid glycoprotein 1	-0.45	0.72	2974	3180	1170	3323	5776	4330		0.807961	0.0875676	20754	40	3077	2247	5053	0.05	0.68	0.2
A1AG2_HUMAN	ORM2	Alpha-1-acid glycoprotein 2	0.27	0.36	1632	2477	2619	2346	3055	2208		0.253897	0.451259	14338	55	2055	2482	2632	0.29	0.08	0.23
AACT_HUMAN	SERPINA3	Alpha-1-antichymotrypsin	-0.3	0.73	3888	3251	3129	2689	6276	5547	+	1.90466	0.0137778	24779	35	3569	2909	5911	0.13	0.11	0.09
A1AT_HUMAN	SERPINA1	Alpha-1-antitrypsin	-0.29	0.38	20112	18555	14200	17409	28615	21767		0.905751	0.0707826	120660	7	19334	15805	25191	0.06	0.14	0.19
A1BG_HUMAN	A1BG	Alpha-1B-glycoprotein	-0.67	-0.26	15107	14905	10320	8498	12195	12803	+	1.87772	0.0132857	73827	12	15006	9409	12499	0.01	0.14	0.03
A2MG_HUMAN	A2M	Alpha-2-macroglobulin	-0.38	-0.5	4624	5165	4464	3078	3703	3205		0.68501	0.116289	24239	36	4895	3771	3454	0.08	0.26	0.1
APLP2_HUMAN	APLP2	Amyloid-like protein 2	-0.59	0.67	273	544	271	273	572	730		0.902338	0.0697714	2664	115	409	272	651	0.47	0	0.17
APOA1_HUMAN	APOA1	Apolipoprotein A-I	0.82	1.28	1585	1379	2899	2339	2964	4215	+	1.1262	0.0410794	15381	50	1482	2619	3589	0.1	0.15	0.25
APOA4_HUMAN	APOA4	Apolipoprotein A-IV	0.22	-0.53	3672	5712	5174	5771	2392	4114		0.558045	0.159478	26835	32	4692	5472	3253	0.31	0.08	0.37
APOD_HUMAN	APOD	Apolipoprotein D	0.07	-0.14	463	1379	608	1330	690	981		0.0162865	0.980403	5450	90	921	969	835	0.7	0.53	0.25
APOL1_HUMAN	APOL1	Apolipoprotein L1	-0.16	-0.19	698	729	747	529	576	676		0.174803	0.620211	3956	104	714	638	626	0.03	0.24	0.11
PGBM_HUMAN	HSPG2	Basement membrane-specific heparan sulfate proteoglycan core protein	-0.63	-0.36	2737	3316	2399	1500	2184	2545		0.682997	0.112233	14680	53	3026	1950	2364	0.14	0.33	0.11
B4GA1_HUMAN	B4GAT1	Beta-1,4-glucuronyltransferase 1	-0.58	-0.45	63447	62303	42389	41510	44746	47553	+	2.99622	0	301948	3	62875	41950	46150	0.01	0.01	0.04
CPMD8_HUMAN	CPAMD8	C3 and PZP-like alpha-2-macroglobulin domain-containing protein 8	-0.27	1.8	1050	1336	860	1117	4603	3695	+	2.14068	0.006	12661	63	1193	989	4149	0.17	0.18	0.15
CBPQ_HUMAN	CPQ	Carboxypeptidase Q	0.06	-0.83	4241	5391	5297	4730	2313	3107	+	1.24236	0.0372857	25079	34	4816	5014	2710	0.17	0.08	0.21
COMP_HUMAN	COMP	Cartilage oligomeric matrix protein	-0.68	-0.69	2292	2241	1443	1378	1336	1470	+	2.85904	0	10159	72	2266	1410	1403	0.02	0.03	0.07
CATD_HUMAN	CTSD	Cathepsin D	0	-0.53	2517	2888	3213	2181	1981	1764		0.586473	0.141582	14545	54	2703	2697	1873	0.1	0.27	0.08
CERU_HUMAN	CP	Ceruloplasmin	-1.6	-0.38	21066	25205	7320	7945	20573	15024	+	1.57795	0.0165263	97133	8	23136	7632	17798	0.13	0.06	0.22
CH3L1_HUMAN	CHI3L1	Chitinase-3-like protein 1	0.17	0.05	620	270	562	441	511	411		0.029366	0.970598	2816	112	445	502	461	0.56	0.17	0.15
CLUS_HUMAN	CLU	Clusterin	-0.74	0.25	2620	2722	1848	1360	3038	3309	+	1.84416	0.0124	14897	52	2671	1604	3173	0.03	0.22	0.06
C1R_HUMAN	C1R	Complement C1r subcomponent	0.29	0.52	1639	2164	2967	1686	2672	2765		0.343288	0.317922	13894	57	1902	2327	2719	0.2	0.39	0.02
CO3_HUMAN	C3	Complement C3	0.4	0.88	2485	5762	5558	5324	8308	6843		0.688231	0.116293	34279	25	4123	5441	7576	0.56	0.03	0.14
CO4A_HUMAN	C4A	Complement C4-A	-0.48	-0.55	6849	7141	5307	4738	4987	4539	+	1.9692	0.0143077	33561	26	6995	5023	4763	0.03	0.08	0.07
CO5_HUMAN	C5 CPAMD4	Complement component C5	-0.45	-0.69	40724	42726	28269	32791	25843	25845	+	2.03632	0.0155	196197	4	41725	30530	25844	0.03	0.1	0
CO6_HUMAN	C6	Complement component C6	0.3	0.4	4645	8470	7472	8722	7940	9372		0.271862	0.420302	46623	17	6558	8097	8656	0.41	0.11	0.12
CO7_HUMAN	C7	Complement component C7	-0.03	-0.48	4189	3863	4145	3731	3029	2736	+	1.49416	0.0222222	21693	39	4026	3938	2883	0.06	0.07	0.07
CO8G_HUMAN	C8G	Complement component C8 gamma chain	-0.84	-1.25	2207	1805	959	1278	684	1007	+	1.43209	0.02575	7940	79	2006	1119	846	0.14	0.2	0.27
CO9_HUMAN	C9	Complement component C9	-0.81	-0.28	622	496	356	280	360	561		0.691973	0.114617	2675	114	559	318	461	0.16	0.17	0.31
FHR2_HUMAN	CFHR2	Complement factor H-related protein 2	-1.2	-0.92	1065	814	403	415	484	510	+	1.56987	0.0161026	3692	108	940	409	497	0.19	0.02	0.04
CRP_HUMAN	CRP	C-reactive protein	0	0.47	258	570	329	500	540	611		0.275665	0.415962	2809	113	414	415	576	0.53	0.29	0.09
DSC3_HUMAN	DSC3	Desmocollin-3	-1.23	-0.65	7784	11427	4486	3688	6038	6233	+	1.10625	0.0440625	39656	20	9605	4087	6135	0.27	0.14	0.02
DESP_HUMAN	DSP	Desmoplakin	2.63	3.64	424	342	2429	2314	4803	4745	+	4.83016	0	15057	51	383	2372	4774	0.15	0.03	0.01
DKK3_HUMAN	DKK3	Dickkopf-related protein 3	-1.37	-1.46	11515	16574	6286	4612	5694	4499	+	1.34546	0.0328302	49181	15	14045	5449	5097	0.25	0.22	0.17
DPP2_HUMAN	DPP7	Dipeptidyl peptidase 2	-0.08	0.39	386	328	374	303	427	512		0.829511	0.0820274	2330	116	357	338	469	0.11	0.15	0.13
ENPP2_HUMAN	ENPP2	Ectonucleotide pyrophosphatase/phosphodiesterase family member 2	-0.64	-0.5	780	826	550	481	561	575	+	2.15927	0.00631579	3774	106	803	516	568	0.04	0.09	0.02
LACRT_HUMAN	LACRT	Extracellular glycoprotein lacritin	0.32	2.63	1760	2140	3417	1438	11362	12706	+	2.48173	0	32823	28	1950	2427	12034	0.14	0.58	0.08
FIBB_HUMAN	FGB	Fibrinogen beta chain	-0.55	-1.05	465	524	282	395	230	248	+	1.43179	0.0252245	2142	117	494	338	239	0.08	0.24	0.05
FIBG_HUMAN	FGG	Fibrinogen gamma chain	0.56	0.84	695	484	970	773	792	1319		0.51971	0.180379	5034	95	590	872	1056	0.25	0.16	0.35
FSTL5_HUMAN	FSTL5	Follistatin-related protein 5	0.29	2.97	612	1061	927	1119	5951	7134	+	2.57814	0	16803	48	836	1023	6542	0.38	0.13	0.13
SAP3_HUMAN	GM2A	Ganglioside GM2 activator	-0.61	-1.72	5187	4518	3538	2822	1403	1535	+	2.08164	0.0116364	19003	43	4853	3180	1469	0.1	0.16	0.06
GELS_HUMAN	GSN	Gelsolin	-1.19	-0.73	8869	8676	3503	4182	5448	5127	+	2.90515	0	35804	22	8772	3842	5288	0.02	0.12	0.04
QPCT_HUMAN	QPCT	Glutaminyl-peptide cyclotransferase	-0.21	-0.11	983	950	927	739	912	885		0.438144	0.242939	5395	92	966	833	898	0.02	0.16	0.02
HEMO_HUMAN	HPX	Hemopexin	-0.63	0	12258	11911	7656	7957	11222	12901	+	1.84645	0.0128276	63905	14	12084	7807	12062	0.02	0.03	0.1
HGFL_HUMAN	MST1	Hepatocyte growth factor-like protein	-0.85	-1.09	4336	2474	2135	1648	1518	1675		0.719945	0.109641	13787	58	3405	1892	1597	0.39	0.18	0.07
IGHA1_HUMAN	IGHA1	Ig alpha-1 chain C region	-0.78	0.15	4708	5818	3176	2966	6236	5446	+	1.49931	0.0227273	28350	31	5263	3071	5841	0.15	0.05	0.1
IGHG1_HUMAN	IGHG1	Ig gamma-1 chain C region	-0.6	-0.07	6116	6493	4366	3953	5635	6353	+	1.71827	0.0184706	32915	27	6304	4159	5994	0.04	0.07	0.08
IGHG2_HUMAN	IGHG2	Ig gamma-2 chain C region	-0.46	0.29	5110	6843	3767	4919	6096	8488		0.655917	0.119448	35223	23	5977	4343	7292	0.21	0.19	0.23
IGKC_HUMAN	IGKC	Ig kappa chain C region	0	0.41	9304	11081	10168	10200	12725	14279	+	1.19421	0.0366667	67757	13	10192	10184	13502	0.12	0	0.08
LAC2_HUMAN	IGLC2	Ig lambda-2 chain C regions	-0.79	1.84	1313	1324	801	725	3525	5935	+	1.29933	0.0336727	13623	59	1319	763	4730	0.01	0.07	0.36
HV169_HUMAN	IGHV1-69	Immunoglobulin heavy variable 1-69	-0.65	-0.58	712	1076	605	537	131	1061		0.149429	0.679409	4122	101	894	571	596	0.29	0.08	1.1
HV404_HUMAN	IGHV4-4	Immunoglobulin heavy variable 4-4	0.53	1.1	190	144	203	280	365	348	+	1.48344	0.0217391	1529	119	167	241	356	0.2	0.22	0.03
HV461_HUMAN	IGHV4-61	Immunoglobulin heavy variable 4-61	0.62	0.61	499	600	755	939	442	1232		0.191513	0.592793	4468	98	550	847	837	0.13	0.15	0.67
HV551_HUMAN	IGHV5-51	Immunoglobulin heavy variable 5-51	-0.49	0.82	463	429	420	217	629	941		0.954554	0.0618182	3099	110	446	318	785	0.05	0.45	0.28
KV230_HUMAN	IGKV2-30	Immunoglobulin kappa variable 2-30	-0.91	-0.7	2666	1997	1480	998	1688	1186		0.888037	0.0703662	10014	73	2331	1239	1437	0.2	0.27	0.25
KVD20_HUMAN	IGKV3D-20	Immunoglobulin kappa variable 3-20	-0.33	0.66	1613	1673	1186	1429	2563	2630	+	2.60206	0	11094	70	1643	1307	2597	0.03	0.13	0.02
KVD11_HUMAN	IGKV3D-11	Immunoglobulin kappa variable 3D-11	-0.48	-0.22	2452	951	825	1608	1280	1651		0.0948082	0.827759	8767	74	1702	1216	1466	0.62	0.46	0.18
IGLL5_HUMAN	IGLL5	Immunoglobulin lambda-like polypeptide 5	-0.73	0.5	677	924	704	263	801	1468		0.51673	0.181125	4837	96	801	484	1134	0.22	0.64	0.42
IBP7_HUMAN	IGFBP7	Insulin-like growth factor-binding protein 7	-0.48	-0.25	1961	2525	1570	1648	2074	1687		0.648936	0.119685	11466	68	2243	1609	1880	0.18	0.03	0.15
ITIH5_HUMAN	ITIH5	Inter-alpha-trypsin inhibitor heavy chain H5	0.19	0.71	757	1947	1462	1616	2196	2239		0.498934	0.197526	10218	71	1352	1539	2218	0.62	0.07	0.01
KAIN_HUMAN	SERPINA4	Kallistatin	1.42	3.82	2889	2156	7776	5677	39088	31910	+	2.50318	0	89496	9	2522	6727	35499	0.21	0.22	0.14
K1C10_HUMAN	KRT10	Keratin, type I cytoskeletal 10	-1.05	0.21	1495	1276	558	780	1346	1856	+	1.20209	0.0372881	7311	81	1386	669	1601	0.11	0.24	0.23
K1C13_HUMAN	KRT13	Keratin, type I cytoskeletal 13	-0.44	-1.04	1363	1369	1134	883	613	718	+	1.73086	0.0190303	6079	84	1366	1009	665	0	0.18	0.11
K1C16_HUMAN	KRT16	Keratin, type I cytoskeletal 16	-0.49	-0.99	3368	3090	2388	2221	1384	1871	+	1.81037	0.012	14322	56	3229	2304	1628	0.06	0.05	0.21
K1C19_HUMAN	KRT19	Keratin, type I cytoskeletal 19	-0.47	-0.55	4236	3606	2683	2989	2544	2807	+	1.31789	0.0342963	18866	44	3921	2836	2676	0.11	0.08	0.07
K1C24_HUMAN	KRT24	Keratin, type I cytoskeletal 24	-0.21	-1.12	2350	1203	1492	1573	609	1024		0.551815	0.163269	8250	76	1777	1532	816	0.46	0.04	0.36
K1C27_HUMAN	KRT27	Keratin, type I cytoskeletal 27	-0.48	-0.35	2182	2399	1863	1426	1545	2037		0.696153	0.11305	11451	69	2290	1644	1791	0.07	0.19	0.19
K1C9_HUMAN	KRT9	Keratin, type I cytoskeletal 9	0.06	-0.72	27470	25099	26868	27952	16183	15828	+	2.5032	0	139400	6	26285	27410	16006	0.06	0.03	0.02
K2C1_HUMAN	KRT1	Keratin, type II cytoskeletal 1	-0.18	-0.61	27534	29814	24492	26163	19370	18271	+	2.03788	0.0161739	145644	5	28674	25328	18821	0.06	0.05	0.04
K22E_HUMAN	KRT2	Keratin, type II cytoskeletal 2 epidermal	-0.04	-0.31	13298	14018	13477	13003	10629	11393	+	1.68135	0.0179429	75818	10	13658	13240	11011	0.04	0.03	0.05
K2C5_HUMAN	KRT5	Keratin, type II cytoskeletal 5	-0.48	-1.06	10187	8847	7501	6192	4022	5138	+	1.57822	0.016973	41886	18	9517	6846	4580	0.1	0.14	0.17
K2C6A_HUMAN	KRT6A	Keratin, type II cytoskeletal 6A	0.48	-0.26	437	624	704	772	371	513		0.917648	0.0678235	3421	109	531	738	442	0.25	0.06	0.23
K2C6C_HUMAN	KRT6C	Keratin, type II cytoskeletal 6C	0.34	0.11	1605	857	1438	1669	1483	1179		0.175469	0.623469	8231	77	1231	1553	1331	0.43	0.1	0.16
K2C71_HUMAN	KRT71	Keratin, type II cytoskeletal 71	0.32	0.7	2068	3081	3445	2967	4829	3559		0.684282	0.114905	19948	41	2574	3206	4194	0.28	0.11	0.21
K2C74_HUMAN	KRT74	Keratin, type II cytoskeletal 74	-0.34	0.21	774	1097	703	776	1223	943		0.532081	0.174043	5516	89	935	739	1083	0.24	0.07	0.18
K2C75_HUMAN	KRT75	Keratin, type II cytoskeletal 75	-0.36	-0.63	873	814	669	650	403	685		0.755581	0.0997368	4094	102	844	659	544	0.05	0.02	0.37
K2C79_HUMAN	KRT79	Keratin, type II cytoskeletal 79	0.88	2.21	394	450	919	639	1867	2035	+	2.51687	0	6305	83	422	779	1951	0.09	0.25	0.06
KERA_HUMAN	KERA	Keratocan	1.52	1.48	204	228	516	725	545	658	+	1.3793	0.0316078	2877	111	216	621	602	0.08	0.24	0.13
KNG1_HUMAN	KNG1	Kininogen-1	-0.53	-1.13	1312	1198	1026	716	313	837		0.801772	0.0864	5401	91	1255	871	575	0.06	0.25	0.65
LTBP2_HUMAN	LTBP2	Latent-transforming growth factor beta-binding protein 2	0.23	0.23	5329	5020	5972	6179	6332	5836	+	1.23776	0.0366316	34667	24	5174	6075	6084	0.04	0.02	0.06
LRP2_HUMAN	LRP2	Low-density lipoprotein receptor-related protein 2	-0.31	0.83	890	778	528	821	1613	1362	+	1.51282	0.0243902	5992	86	834	675	1487	0.09	0.31	0.12
LUM_HUMAN	LUM	Lumican	3.05	4.54	442	373	3086	3659	11638	7336	+	1.50662	0.0232558	26533	33	407	3373	9487	0.12	0.12	0.32
CD14_HUMAN	CD14	Monocyte differentiation antigen CD14	-0.81	-1.28	1114	915	630	525	406	430	+	1.80214	0.011625	4021	103	1015	578	418	0.14	0.13	0.04
MYOC_HUMAN	MYOC	Myocilin	-0.56	0.75	3314	1535	1837	1451	4162	3980		1.00386	0.0550769	16279	49	2424	1644	4071	0.52	0.17	0.03
ASPG_HUMAN	AGA	N(4)-(beta-N-acetylglucosaminyl)-L-asparaginase	-0.42	-1.67	1194	1612	1180	919	397	488	+	1.39551	0.02984	5789	88	1403	1049	442	0.21	0.18	0.15
NRX3A_HUMAN	NRXN3	Neurexin-3	-0.22	-0.63	3558	4236	4272	2416	2837	2213		0.413926	0.258828	19532	42	3897	3344	2525	0.12	0.39	0.17
NBL1_HUMAN	NBL1	Neuroblastoma suppressor of tumorigenicity 1	0.06	-0.21	2588	2029	2646	2179	1876	2109		0.327982	0.336932	13425	60	2308	2412	1992	0.17	0.14	0.08
NRCAM_HUMAN	NRCAM	Neuronal cell adhesion molecule	0.79	0.71	384	662	796	1015	732	980		0.683134	0.113553	4570	97	523	905	856	0.38	0.17	0.2
OSTP_HUMAN	SPP1	Osteopontin	-1.24	-1.56	12683	10722	5619	4315	3732	4180	+	2.11455	0.00571429	41251	19	11702	4967	3956	0.12	0.19	0.08
PEBP1_HUMAN	PEBP1	Phosphatidylethanolamine-binding protein 1	-0.6	-0.52	2323	3239	1877	1803	1619	2264		0.645342	0.119867	13125	61	2781	1840	1942	0.23	0.03	0.23
PEDF_HUMAN	PEDF	Pigment epithelium-derived factor	-1.36	-0.07	5753	7919	2757	2576	6537	6499	+	1.50769	0.0238095	32041	30	6836	2666	6518	0.22	0.05	0
POTEE_HUMAN	POTEE	POTE ankyrin domain family member E	-0.91	-2.5	1315	876	615	550	278	110	+	1.37582	0.031	3745	107	1096	583	194	0.28	0.08	0.61
SAP_HUMAN	PSAP	Prosaposin	-0.4	-0.72	3296	4501	3047	2845	2129	2595		0.8721	0.0745	18413	45	3899	2946	2362	0.22	0.05	0.14
PTGDS_HUMAN	PTGDS	Prostaglandin-H2 D-isomerase	-0.51	-1.09	10339	11611	7471	7916	5068	5214	+	2.37381	0	47620	16	10975	7694	5141	0.08	0.04	0.02
AMBP_HUMAN	AMBP	Protein AMBP	0.58	0.82	1264	660	1665	1212	1677	1722		0.705996	0.111595	8201	78	962	1439	1700	0.44	0.22	0.02
FAM3C_HUMAN	FAM3C	Protein FAM3C	-0.14	0.12	2167	2015	2055	1733	2217	2322		0.726003	0.109506	12510	64	2091	1894	2270	0.05	0.12	0.03
A0A075B7B8_HUMAN	IGHV3OR16-12	Protein IGHV3OR16-12 (Fragment)	-0.37	0.13	1601	1364	1163	1130	1863	1391		0.655722	0.118091	8511	75	1482	1146	1627	0.11	0.02	0.21
A0A075B7E8_HUMAN	IGHV3OR16-13	Protein IGHV3OR16-13 (Fragment)	0.42	-0.25	839	825	1123	1109	754	641	+	2.1879	0.00705882	5290	93	832	1116	697	0.01	0.01	0.11
A0A0B4J2B5_HUMAN	IGHV3OR16-9	Protein IGHV3OR16-9 (Fragment)	-0.9	0.63	465	924	354	389	1075	1080	+	1.13553	0.039871	4287	100	694	372	1077	0.47	0.07	0
A0A075B6H7_HUMAN	IGKV3-7	Protein IGKV3-7 (Fragment)	-0.08	-0.11	2223	3962	2662	3200	2570	3159		0.0192852	0.985525	17776	47	3093	2931	2865	0.4	0.13	0.15
LC1L1_HUMAN	LCN1P1	Putative lipocalin 1-like protein 1	0.28	0.13	649	683	703	910	632	825		0.258844	0.448299	4403	99	666	807	729	0.04	0.18	0.19
RET3_HUMAN	RBP3	Retinol-binding protein 3	-0.37	-0.63	14792	15793	11798	11921	9670	10038	+	2.59257	0	74011	11	15292	11860	9854	0.05	0.01	0.03
APRV1_HUMAN	ASPRV1	Retroviral-like aspartic protease 1	-0.2	-1.03	1351	1384	1418	961	649	688	+	1.16637	0.0382951	6451	82	1368	1189	669	0.02	0.27	0.04
SEM4B_HUMAN	SEMA4B	Semaphorin-4B	0.14	0.5	785	924	946	938	1492	920		0.373036	0.29492	6005	85	854	942	1206	0.11	0.01	0.34
TRFE_HUMAN	TF	Serotransferrin	0.27	-0.05	107280	101225	124884	126897	107982	92727	+	1.22307	0.036	660996	2	104253	125891	100354	0.04	0.01	0.11
ALBU_HUMAN	ALB	Serum albumin	0.54	0.58	485961	434473	665002	676749	668661	710146	+	2.21023	0.0075	3640990	1	460217	670875	689403	0.08	0.01	0.04
PON1_HUMAN	PON1	Serum paraoxonase/arylesterase 1	-0.1	0.17	2148	1943	2064	1748	2031	2561		0.360431	0.307842	12496	65	2046	1906	2296	0.07	0.12	0.16
PON3_HUMAN	PON3	Serum paraoxonase/lactonase 3	-0.3	0.76	1811	1541	1336	1389	3046	2643	+	1.99848	0.01488	11766	67	1676	1362	2844	0.11	0.03	0.1
TICN2_HUMAN	SPOCK2	Testican-2	-0.83	-1.09	2733	3358	1846	1590	1520	1340	+	1.6788	0.0174444	12389	66	3046	1718	1430	0.15	0.11	0.09
TIMP1_HUMAN	TIMP1	Metalloproteinase inhibitor 1	-0.88	-1.06	7716	8311	4867	3811	3966	3701	+	2.17189	0.00666667	32372	29	8013	4339	3834	0.05	0.17	0.05
THBG_HUMAN	SERPINA7	Thyroxine-binding globulin	-0.68	-3.15	1564	1882	1177	968	230	158	+	2.26591	0	5979	87	1723	1073	194	0.13	0.14	0.26
RS27A_HUMAN	RPS27A	Ubiquitin-40S ribosomal protein S27a	0.03	-0.36	2486	3978	3291	3329	2685	2367		0.322592	0.338308	18135	46	3232	3310	2526	0.33	0.01	0.09
RL40_HUMAN	UBA52	Ubiquitin-60S ribosomal protein L40	0.15	0.35	1359	982	1295	1304	1779	1205		0.239336	0.486459	7924	80	1171	1299	1492	0.23	0.01	0.27
GALE_HUMAN	GALE	UDP-glucose 4-epimerase	0.16	-0.15	824	867	1160	736	804	724		0.201115	0.570473	5115	94	846	948	764	0.04	0.32	0.07
CSPG2_HUMAN	VCAN	Versican core protein	-1.87	-1.07	3680	3634	1324	676	1695	1795	+	2.33053	0	12804	62	3657	1000	1745	0.01	0.46	0.04
VTDB_HUMAN	GC	Vitamin D-binding protein	-0.47	0.05	206	486	282	217	383	332		0.185893	0.602321	1906	118	346	249	358	0.57	0.18	0.1
ZA2G_HUMAN	AZGP1	Zinc-alpha-2-glycoprotein	-0.92	0.12	8003	6404	3532	4073	8372	7321	+	1.53515	0.0221	37706	21	7204	3803	7847	0.16	0.1	0.09
